# Supplementary material for: Patient safety culture in South America: a cross-sectional study
Source: PubMed Central journal article supplement — BMJ Open Qual. 2023 Oct 6;12(4):e002362. doi: 10.1136/bmjoq-2023-002362 (PMC10565275; doi:10.1136/bmjoq-2023-002362), 2023-10-06

## SUPPLEMENTARY FIGURE

**Supplementary Graphic 1S.** Distribution of positive responses of Hospital Survey on Patient Safety Culture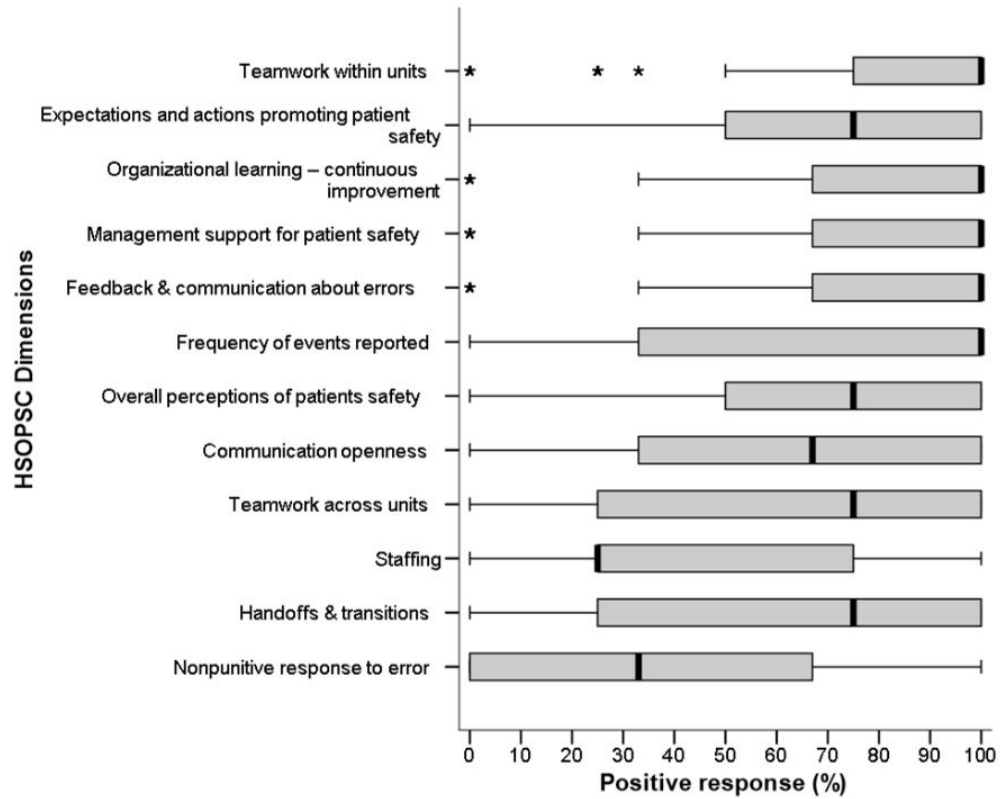

Supplement: bmjoq-2023-002362supp001.pdf [file bmjoq-2023-002362supp001.pdf]
